# Supplementary material for: Negative Influence of Aging on Differentiation and Proliferation of CD8+ T-Cells in Dogs
Source: MDPI journal article supplement (doi:10.3390/vetsci10090541), 2023-08-25
Supplement: s1 [file s1]

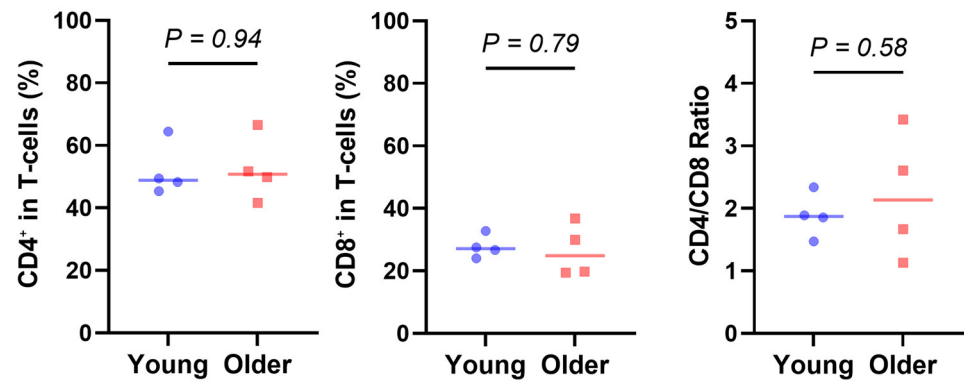

**Figure S1.** Percentage and ratio of CD4<sup>+</sup> or CD8<sup>+</sup> T-cells in peripheral blood of young and older dogs. Each plot represents individual data. n = 4 for each group.

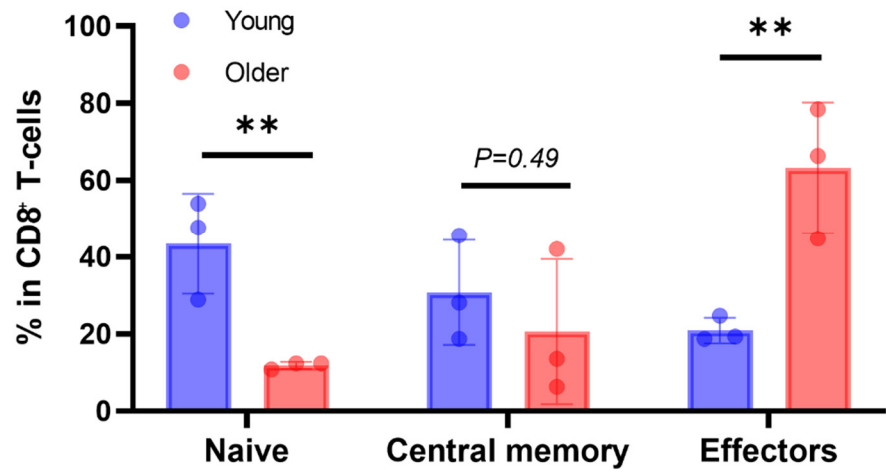

**Figure S2.** Percentage of CD8<sup>+</sup> T-cell subsets at day 8 post-stimulation. Each plot represents individual data. \*\*  $p < 0.01$ . n = 3 for each group.

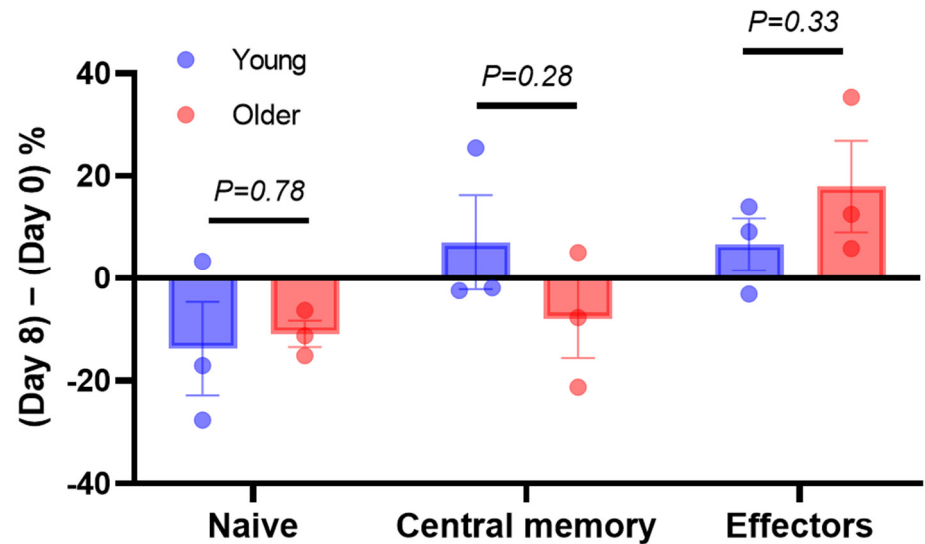

**Figure S3.** Percentage changes in subsets in CD8<sup>+</sup> T-cells from day 0 to day 8 post-stimulation. Each plot represents individual data.  $n = 3$  for each group.

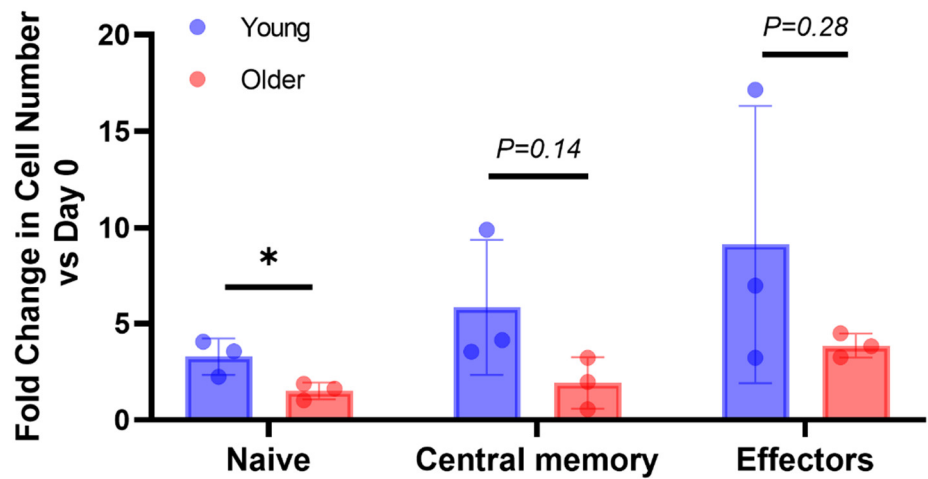

**Figure S4.** Fold changes in cell numbers of each CD8<sup>+</sup> T-cell subsets on day 8 post-stimulation compared with pre-stimulation. Each plot represents individual data.  $*p < 0.05$ .  $n = 3$  for each group.
